# Supplementary material for: Symbolic flux analysis for genome-scale metabolic networks
Source: Springer Nature journal article supplement (doi:10.1186/1752-0509-5-81), 2011-05-23
Supplement: Additional file 2 [file 1752-0509-5-81-s2.pdf]

# Additional file 2 for the paper entitled: Symbolic flux analysis for genome-scale metabolic networks

David W. Schryer<sup>1</sup>, Marko Vendelin<sup>1</sup>, Pearu Peterson\*<sup>1</sup>

<sup>1</sup>Laboratory of Systems Biology, Institute of Cybernetics at Tallinn University of Technology, Akadeemia tee 21, 12618 Tallinn, Estonia

Email: David W. Schryer - david@sysbio.ioc.ee; Marko Vendelin - markov@sysbio.ioc.ee; Pearu Peterson\* - pearu@sysbio.ioc.ee;

\*Corresponding author

## Contents

|          |                                                                           |           |
|----------|---------------------------------------------------------------------------|-----------|
| <b>1</b> | <b>Introduction</b>                                                       | <b>1</b>  |
| <b>2</b> | <b>Contents of the SBML model of the example yeast network</b>            | <b>2</b>  |
| 2.1      | Definition of all species . . . . .                                       | 2         |
| 2.2      | Definition of all reactions . . . . .                                     | 4         |
| <b>3</b> | <b>Symbolic solution of the steady state problem</b>                      | <b>9</b>  |
| 3.1      | Flux relations . . . . .                                                  | 9         |
| 3.2      | Constraints . . . . .                                                     | 13        |
| <b>4</b> | <b>Values of independent fluxes used to generate Figure 1.</b>            | <b>15</b> |
| <b>5</b> | <b>Symbolic solution of the steady state problem with measured values</b> | <b>16</b> |
| 5.1      | Flux relations . . . . .                                                  | 16        |
| 5.2      | Constraints . . . . .                                                     | 19        |

## 1 Introduction

This document is a supplementary material to the above article and acts as a companion to the SBML file provided as additional file 1: yeast\_example.xml. The content of this document is generated from the SBML file and acts as a convenient view of the model of yeast central metabolism. The composition of the model is discussed in the main text.

## 2 Contents of the SBML model of the example yeast network

### 2.1 Definition of all species

Legend: m - mitochondria, c - cytosol, x - external.

| Symbol | Compartments | Description                            |
|--------|--------------|----------------------------------------|
| AA     | c, m         | C00084 Acetaldehyde                    |
| AC     | c, m         | C00033 Acetate                         |
| AH     | c            | C01077 O-Acetyl-L-homoserine           |
| ALA    | c, m, x      | C00041 L-Alanine                       |
| AN     | c            | C00108 Anthranilate                    |
| ARG    | c, x         | C00062 L-Arginine                      |
| AS     | c            | C03406 N-(L-Arginino)succinate         |
| ASN    | c, x         | C00152 L-Asparagine                    |
| ASP    | c, m, x      | C00049 L-Aspartate                     |
| AcCoA  | c, m, x      | C00024 Acetyl-CoA                      |
| C      | c            | C00327 L-Citrulline                    |
| CH     | c            | C00251 Chorismate                      |
| CI     | m            | C00158 Citrate/Isocitrate              |
| CO2    | c, m, x      | C00011 Carbon dioxide                  |
| CP     | c            | C00169 Carbamoyl phosphate             |
| EivP   | c            | C00279 D-Erythrose 4-phosphate         |
| FU     | c, m         | C00122 Fumarate                        |
| FviP   | c, x         | C05345 $\beta$ -D-Fructose 6-phosphate |
| GL     | c, x         | C00031 D-Glucose                       |
| GLN    | c, m, x      | C00064 L-Glutamine                     |
| GLU    | c, m, x      | C00025 L-Glutamate                     |
| GLY    | c, x         | C00037 Glycine                         |
| GP     | c            | C00111 Glycerone phosphate             |
| GiiiP  | c, x         | C00118 D-Glyceraldehyde 3-phosphate    |
| GviP   | c, x         | C00668 $\alpha$ -D-Glucose 6-phosphate |
| HC     | c            | C00155 L-Homocysteine                  |
| HCO3-  | c, m         | C00288 Bicarbonate                     |
| HIS    | c, x         | C00135 L-Histidine                     |
| I      | c            | C00463 Indole                          |
| ILE    | c, m, x      | C00407 L-Isoleucine                    |
| IOS    | c, m         | C04236 (2S)-2-Isopropyl-3-oxosuccinate |
| IP     | c            | C03506 Indoleglycerol phosphate        |
| LEU    | c, m, x      | C00123 L-Leucine                       |
| LYS    | c, x         | C00047 L-Lysine                        |
| MA     | m            | C00149 Malate                          |
| MET    | c, x         | C00073 L-Methionine                    |
| MO     | c, m         | C00141 3-Methyl-2-oxobutanoic acid     |

table continues ...

Table 1: (continued)

| Symbol   | Compartments | Description                                                    |
|----------|--------------|----------------------------------------------------------------|
| OA       | c, m, x      | C00036 Oxaloacetate                                            |
| OAG      | c            | C05533 Oxaloglutarate                                          |
| OG       | c, m         | C00026 2-Oxoglutarate                                          |
| OR       | c, m         | C00077 L-Ornithine                                             |
| PEP      | c            | C00074 Phosphoenolpyruvate                                     |
| PHE      | c, x         | C00079 L-Phenylalanine                                         |
| PRO      | c, x         | C00148 L-Proline                                               |
| PY       | c, m         | C00022 Pyruvate                                                |
| PvRA     | c            | C04302 N-(5-Phospho- $\beta$ -D-riboseyl)anthranilate          |
| RLvP     | c            | C00199 D-Ribulose 5-phosphate                                  |
| RvP      | c, x         | C00117 D-Ribose 5-phosphate                                    |
| SER      | c, x         | C00065 L-Serine                                                |
| SU       | m            | C00042 Succinate                                               |
| SUCoA    | m            | C00091 Succinyl-CoA                                            |
| SiiiP    | c            | C03175 Shikimate 3-phosphate                                   |
| SviiP    | c            | C05382 D-Sedoheptulose 7-phosphate                             |
| THR      | c, m, x      | C00188 L-Threonine                                             |
| TRP      | c, x         | C00078 L-Tryptophan                                            |
| TYR      | c, x         | C00082 L-Tyrosine                                              |
| VAL      | c, m, x      | C00183 L-Valine                                                |
| XvP      | c            | C00231 D-Xylulose 5-phosphate                                  |
| XviCPA   | c            | Six carbon analogue used in the CPA reaction.                  |
| YiGOG    | c, m         | One carbon analogue used in GLU-OG stoichiometry.              |
| YiiXvP   | c            | Intermediate product of reaction R01830 (TKL1 or TKL2)         |
| ZiiPY    | m            | Part of PY used in ILE, VAL, and LEU biosynthesis.             |
| ZiiXvP   | c            | Intermediate product of reaction R01641 (TKL1 or TKL2)         |
| ZiiiFviP | c            | Intermediate product of reaction R01827 (TAL1)                 |
| ZivALT   | c, m         | Used to link the stoichiometry of the ALT reaction.            |
| ZvAAT    | c, m         | Used to link the stoichiometry of the AAT1 and AAT2 reactions. |
| ZviGOG   | c, m         | Six carbon analogue used in GLU-OG stoichiometry.              |

## 2.2 Definition of all reactions

| Gene                        | Reaction/flux                                                     |                        |
|-----------------------------|-------------------------------------------------------------------|------------------------|
| <b>Cytosolic reactions:</b> |                                                                   |                        |
| AAo                         | $\frac{\nu_{AAo\_ACo}}{\nu_{AAo\_ACo}}$                           | ACo                    |
| ACo                         | $\frac{\nu_{ACo\_AcCoAo}}{\nu_{ACo\_AcCoAo}}$                     | AcCoAo                 |
| BCo + GLNo                  | $\frac{\nu_{BCo\_CPo\_01}}{\nu_{BCo\_CPo\_01}}$                   | XviCPAo                |
| XviCPAo                     | $\frac{\nu_{BCo\_CPo\_02}}{\nu_{BCo\_CPo\_02}}$                   | CPo + GLUo             |
| AHo                         | $\frac{\nu_{B\_AC\_01}}{\nu_{B\_AC\_01}}$                         | ACo + HCo              |
| ASPo                        | $\frac{\nu_{B\_ASP\_ASN}}{\nu_{B\_ASP\_ASN}}$                     | ASNo                   |
| ASPo                        | $\frac{\nu_{B\_ASP\_THR}}{\nu_{B\_ASP\_THR}}$                     | THRo                   |
| ASPo + AcCoAo               | $\frac{\nu_{B\_AcCoA\_01}}{\nu_{B\_AcCoA\_01}}$                   | AHo                    |
| GLUo                        | $\frac{\nu_{B\_GLU\_GLN}}{\nu_{B\_GLU\_GLN}}$                     | GLNo                   |
| GLUo                        | $\frac{\nu_{B\_GLU\_PRO}}{\nu_{B\_GLU\_PRO}}$                     | PROo                   |
| SERo                        | $\frac{\nu_{B\_GiiiP\_GLY}}{\nu_{B\_GiiiP\_GLY}}$                 | CO <sub>2</sub> + GLYo |
| GiiiPo                      | $\frac{\nu_{B\_GiiiP\_SER}}{\nu_{B\_GiiiP\_SER}}$                 | SERo                   |
| AcCoAo + OGo                | $\frac{\nu_{B\_LYS\_C1}}{\nu_{B\_LYS\_C1}}$                       | OAGo                   |
| OAGo                        | $\frac{\nu_{B\_LYS\_C2}}{\nu_{B\_LYS\_C2}}$                       | CO <sub>2</sub> + LYSo |
| BCo + HCo                   | $\frac{\nu_{B\_OA\_AcCoA\_MET}}{\nu_{B\_OA\_AcCoA\_MET}}$         | METo                   |
| BCo + OAo                   | $\frac{\nu_{B\_OAo\_ASP\_01}}{\nu_{B\_OAo\_ASP\_01}}$             | ZvAATo                 |
| ZvAATo                      | $\frac{\nu_{B\_OAo\_ASP\_02}}{\nu_{B\_OAo\_ASP\_02}}$             | ASPo + YiGOGo          |
| OGo                         | $\frac{\nu_{B\_OG\_GLU\_C}}{\nu_{B\_OG\_GLU\_C}}$                 | GLUo                   |
| PEPo + SiiiPo               | $\frac{\nu_{B\_PEP\_01}}{\nu_{B\_PEP\_01}}$                       | CHo                    |
| EivPo + PEPo                | $\frac{\nu_{B\_PEP\_EivP\_01}}{\nu_{B\_PEP\_EivP\_01}}$           | SiiiPo                 |
| CHo                         | $\frac{\nu_{B\_PEP\_EivP\_PHE}}{\nu_{B\_PEP\_EivP\_PHE}}$         | CO <sub>2</sub> + PHEo |
| CHo                         | $\frac{\nu_{B\_PEP\_EivP\_TRP\_01}}{\nu_{B\_PEP\_EivP\_TRP\_01}}$ | ANo + PYo              |
| ANo + RvPo                  | $\frac{\nu_{B\_PEP\_EivP\_TRP\_02}}{\nu_{B\_PEP\_EivP\_TRP\_02}}$ | PvRAo                  |
| PvRAo                       | $\frac{\nu_{B\_PEP\_EivP\_TRP\_03}}{\nu_{B\_PEP\_EivP\_TRP\_03}}$ | CO <sub>2</sub> + IPo  |
| IPo                         | $\frac{\nu_{B\_PEP\_EivP\_TRP\_04}}{\nu_{B\_PEP\_EivP\_TRP\_04}}$ | GiiiPo + Io            |
| Io + SERo                   | $\frac{\nu_{B\_PEP\_EivP\_TRP\_05}}{\nu_{B\_PEP\_EivP\_TRP\_05}}$ | TRPo                   |
| CHo                         | $\frac{\nu_{B\_PEP\_EivP\_TYR}}{\nu_{B\_PEP\_EivP\_TYR}}$         | CO <sub>2</sub> + TYRo |
| BCo + PYo                   | $\frac{\nu_{B\_PY\_ALA\_C1}}{\nu_{B\_PY\_ALA\_C1}}$               | ZivALTo                |
| ZivALTo                     | $\frac{\nu_{B\_PY\_ALA\_C2}}{\nu_{B\_PY\_ALA\_C2}}$               | ALAo + YiGOGo          |
| AcCoAo + MOo                | $\frac{\nu_{B\_PY\_AcCoA\_C}}{\nu_{B\_PY\_AcCoA\_C}}$             | IOSo                   |
| IOSo                        | $\frac{\nu_{B\_PY\_AcCoA\_LEU\_C}}{\nu_{B\_PY\_AcCoA\_LEU\_C}}$   | CO <sub>2</sub> + LEUo |
| MOo                         | $\frac{\nu_{B\_PY\_VAL\_C}}{\nu_{B\_PY\_VAL\_C}}$                 | VALo                   |
| BCo + RvPo                  | $\frac{\nu_{B\_RvP\_HIS}}{\nu_{B\_RvP\_HIS}}$                     | HISo                   |

table continues ...

Table 2: (continued)

| Gene                                       | Reaction/flux                                                |                                           |
|--------------------------------------------|--------------------------------------------------------------|-------------------------------------------|
| THR <sub>o</sub>                           | $\frac{\nu_{B\_THR\_GLY}}{\leftarrow}$                       | ACo + GLY <sub>o</sub>                    |
| CO <sub>2</sub>                            | $\frac{\nu_{CD\_BC}}{\leftarrow}$                            | BCo                                       |
| FviP <sub>o</sub>                          | $\frac{\nu_{FviP\_GP\_GiiiP}}{\leftarrow}$                   | GP <sub>o</sub> + GiiiP <sub>o</sub>      |
| GLU <sub>o</sub> + YiGOG <sub>o</sub>      | $\frac{\nu_{GLU\_OGO\_01}}{\leftarrow}$                      | ZviGOG <sub>o</sub>                       |
| ZviGOG <sub>o</sub>                        | $\frac{\nu_{GLU\_OGO\_02}}{\leftarrow}$                      | BCo + OGo                                 |
| GL <sub>o</sub>                            | $\frac{\nu_{GL\_GviP}}{\leftarrow}$                          | GviP <sub>o</sub>                         |
| GP <sub>o</sub>                            | $\frac{\nu_{GP\_GiiiP}}{\leftarrow}$                         | GiiiP <sub>o</sub>                        |
| GiiiP <sub>o</sub>                         | $\frac{\nu_{GiiiP\_PEP}}{\leftarrow}$                        | PEP <sub>o</sub>                          |
| GviP <sub>o</sub>                          | $\frac{\nu_{GviP\_FviP}}{\leftarrow}$                        | FviP <sub>o</sub>                         |
| GviP <sub>o</sub>                          | $\frac{\nu_{GviP\_RLvP}}{\rightarrow}$                       | CO <sub>2</sub> + RLvP <sub>o</sub>       |
| OAO                                        | $\frac{\nu_{OA\_PEP}}{\rightarrow}$                          | CO <sub>2</sub> + PEP <sub>o</sub>        |
| PEP <sub>o</sub>                           | $\frac{\nu_{PEP\_PY}}{\leftarrow}$                           | PY <sub>o</sub>                           |
| GiiiP <sub>o</sub> + ZiiiFviP <sub>o</sub> | $\frac{\nu_{PPP\_FviP\_EivP\_SviiP\_GiiiP\_01}}{\leftarrow}$ | FviP <sub>o</sub>                         |
| SviiP <sub>o</sub>                         | $\frac{\nu_{PPP\_FviP\_EivP\_SviiP\_GiiiP\_02}}{\leftarrow}$ | EivP <sub>o</sub> + ZiiiFviP <sub>o</sub> |
| FviP <sub>o</sub>                          | $\frac{\nu_{PPP\_FviP\_GiiiP\_XvP\_EivP\_01}}{\leftarrow}$   | EivP <sub>o</sub> + YiiXvP <sub>o</sub>   |
| GiiiP <sub>o</sub> + YiiXvP <sub>o</sub>   | $\frac{\nu_{PPP\_FviP\_GiiiP\_XvP\_EivP\_02}}{\leftarrow}$   | XvP <sub>o</sub>                          |
| RvP <sub>o</sub> + ZiiXvP <sub>o</sub>     | $\frac{\nu_{PPP\_SviiP\_GiiiP\_XvP\_RvP\_01}}{\leftarrow}$   | SviiP <sub>o</sub>                        |
| XvP <sub>o</sub>                           | $\frac{\nu_{PPP\_SviiP\_GiiiP\_XvP\_RvP\_02}}{\leftarrow}$   | GiiiP <sub>o</sub> + ZiiXvP <sub>o</sub>  |
| PY <sub>o</sub>                            | $\frac{\nu_{PY\_AAo}}{\rightarrow}$                          | AAo + CO <sub>2</sub>                     |
| BCo + PY <sub>o</sub>                      | $\frac{\nu_{PY\_OAO}}{\leftarrow}$                           | OAO                                       |
| RLvP <sub>o</sub>                          | $\frac{\nu_{RLvP\_RvP}}{\leftarrow}$                         | RvP <sub>o</sub>                          |
| ARG <sub>o</sub>                           | $\frac{\nu_{US\_ARG\_OR}}{\rightarrow}$                      | CO <sub>2</sub> + ORo                     |
| ASo                                        | $\frac{\nu_{US\_AS\_FU\_ARG}}{\leftarrow}$                   | ARG <sub>o</sub> + FU <sub>o</sub>        |
| ASPo + Co                                  | $\frac{\nu_{US\_C\_ASP\_AS}}{\leftarrow}$                    | ASo                                       |
| CPo + ORo                                  | $\frac{\nu_{US\_OR\_C}}{\leftarrow}$                         | Co                                        |
| XvP <sub>o</sub>                           | $\frac{\nu_{XvP\_RLvP}}{\leftarrow}$                         | RLvP <sub>o</sub>                         |
| <b>Transport reactions:</b>                |                                                              |                                           |
| ALAO                                       | $\frac{\nu_{ALA_{out}}}{\rightarrow}$                        | ALAx                                      |
| ARG <sub>o</sub>                           | $\frac{\nu_{ARG_{out}}}{\rightarrow}$                        | ARGx                                      |
| ASN <sub>o</sub>                           | $\frac{\nu_{ASN_{out}}}{\rightarrow}$                        | ASNx                                      |
| ASPo                                       | $\frac{\nu_{ASP_{out}}}{\rightarrow}$                        | ASPx                                      |
| AcCoAO                                     | $\frac{\nu_{AcCoA_{out}}}{\rightarrow}$                      | AcCoAx                                    |
| CO <sub>2</sub>                            | $\frac{\nu_{CO_2,_{out}}}{\rightarrow}$                      | CO <sub>2</sub>                           |

table continues ...

Table 2: (continued)

| Gene                                                | Reaction/flux                        |                 |
|-----------------------------------------------------|--------------------------------------|-----------------|
| FviPo                                               | $\xrightarrow{\nu_{FviPout}}$        | FviPx           |
| GLNo                                                | $\xrightarrow{\nu_{GLNout}}$         | GLNx            |
| GLUo                                                | $\xrightarrow{\nu_{GLUout}}$         | GLUx            |
| GLYo                                                | $\xrightarrow{\nu_{GLYout}}$         | GLYx            |
| GLx                                                 | $\xrightarrow{\nu_{GLin}}$           | GLo             |
| GiiiPo                                              | $\xrightarrow{\nu_{GiiiPout}}$       | GiiiPx          |
| GviPo                                               | $\xrightarrow{\nu_{GviPout}}$        | GviPx           |
| HISo                                                | $\xrightarrow{\nu_{HISout}}$         | HISx            |
| ILEo                                                | $\xrightarrow{\nu_{ILEout}}$         | ILEx            |
| LEUo                                                | $\xrightarrow{\nu_{LEUout}}$         | LEUx            |
| LYSo                                                | $\xrightarrow{\nu_{LYSout}}$         | LYSx            |
| METo                                                | $\xrightarrow{\nu_{METout}}$         | METx            |
| OAO                                                 | $\xrightarrow{\nu_{OAOout}}$         | OAX             |
| PHEo                                                | $\xrightarrow{\nu_{PHEout}}$         | PHEx            |
| PROo                                                | $\xrightarrow{\nu_{PROout}}$         | PROx            |
| RvPo                                                | $\xrightarrow{\nu_{RvPout}}$         | RvPx            |
| SERo                                                | $\xrightarrow{\nu_{SERout}}$         | SERx            |
| THRo                                                | $\xrightarrow{\nu_{THRout}}$         | THRx            |
| TRPo                                                | $\xrightarrow{\nu_{TRPout}}$         | TRPx            |
| TYRo                                                | $\xrightarrow{\nu_{TYRout}}$         | TYRx            |
| VALo                                                | $\xrightarrow{\nu_{VALout}}$         | VALx            |
| <b>Cytosolic-mitochondrial transport reactions:</b> |                                      |                 |
| AAo                                                 | $\xleftrightarrow{\nu_{AAo\_AAm}}$   | AAm             |
| ALAm                                                | $\xleftrightarrow{\nu_{ALAm\_ALAO}}$ | ALAO            |
| ASPm                                                | $\xleftrightarrow{\nu_{ASPm\_ASPO}}$ | ASPO            |
| CO <sub>2</sub>                                     | $\xleftrightarrow{\nu_{CDm\_CDO}}$   | CO <sub>2</sub> |
| FUo                                                 | $\xleftrightarrow{\nu_{FUo\_FUm}}$   | FUm             |
| GLNo                                                | $\xleftrightarrow{\nu_{GLNo\_GLNm}}$ | GLNm            |
| GLUm                                                | $\xleftrightarrow{\nu_{GLUm\_GLUo}}$ | GLUo            |
| ILEm                                                | $\xleftrightarrow{\nu_{ILEm\_ILEo}}$ | ILEo            |
| IOSm                                                | $\xleftrightarrow{\nu_{IOSm\_IOSo}}$ | IOSo            |
| LEUm                                                | $\xleftrightarrow{\nu_{LEUm\_LEUo}}$ | LEUo            |

table continues ...

Table 2: (continued)

| Gene                            | Reaction/flux                                           |                               |
|---------------------------------|---------------------------------------------------------|-------------------------------|
| MOm                             | $\frac{\nu_{\text{MOm\_MOo}}}{\leftarrow}$              | MOo                           |
| OAO                             | $\frac{\nu_{\text{OAO\_OAm}}}{\leftarrow}$              | OAm                           |
| OGO                             | $\frac{\nu_{\text{OGO\_OGm}}}{\leftarrow}$              | OGm                           |
| ORm                             | $\frac{\nu_{\text{ORm\_ORo}}}{\leftarrow}$              | ORo                           |
| PYO                             | $\frac{\nu_{\text{PYo\_PYm}}}{\leftarrow}$              | PYm                           |
| THRo                            | $\frac{\nu_{\text{THRo\_THRm}}}{\leftarrow}$            | THRm                          |
| VALm                            | $\frac{\nu_{\text{VALm\_VALo}}}{\leftarrow}$            | VALo                          |
| <b>Mitochondrial reactions:</b> |                                                         |                               |
| AAm                             | $\frac{\nu_{\text{AAm\_ACm}}}{\leftarrow}$              | ACm                           |
| ACm                             | $\frac{\nu_{\text{ACm\_AcCoAm}}}{\leftarrow}$           | AcCoAm                        |
| GLNm + OGM                      | $\frac{\nu_{\text{B\_GLT}}}{\leftarrow}$                | 2 GLUm                        |
| GLUm                            | $\frac{\nu_{\text{B\_GLU\_OR}}}{\leftarrow}$            | ORm                           |
| $\text{HCO}_3^- + \text{OAm}$   | $\frac{\nu_{\text{B\_OAm\_ASP\_01}}}{\leftarrow}$       | ZvAATm                        |
| ZvAATm                          | $\frac{\nu_{\text{B\_OAm\_ASP\_02}}}{\leftarrow}$       | ASPm + YiGOGm                 |
| OGm                             | $\frac{\nu_{\text{B\_OG\_GLU\_M}}}{\leftarrow}$         | GLUm                          |
| $\text{HCO}_3^- + \text{PYm}$   | $\frac{\nu_{\text{B\_PY\_ALA\_M1}}}{\leftarrow}$        | ZivALTm                       |
| ZivALTm                         | $\frac{\nu_{\text{B\_PY\_ALA\_M2}}}{\leftarrow}$        | ALAm + YiGOGm                 |
| IOSm                            | $\frac{\nu_{\text{B\_PY\_AcCoA\_LEU\_M}}}{\leftarrow}$  | $\text{CO}_2 + \text{LEUm}$   |
| AcCoAm + MOm                    | $\frac{\nu_{\text{B\_PY\_AcCoA\_M}}}{\leftarrow}$       | IOSm                          |
| PYm                             | $\frac{\nu_{\text{B\_PY\_M1}}}{\leftarrow}$             | $\text{CO}_2 + \text{ZiiPYm}$ |
| PYm + ZiiPYm                    | $\frac{\nu_{\text{B\_PY\_M2}}}{\leftarrow}$             | MOm                           |
| THRm + ZiiPYm                   | $\frac{\nu_{\text{B\_PY\_THR\_ILE}}}{\leftarrow}$       | ILEm                          |
| MOm                             | $\frac{\nu_{\text{B\_PY\_VAL\_M}}}{\leftarrow}$         | VALm                          |
| GLUm + YiGOGm                   | $\frac{\nu_{\text{GLUm\_OGm\_01}}}{\leftarrow}$         | ZviGOGm                       |
| ZviGOGm                         | $\frac{\nu_{\text{GLUm\_OGm\_02}}}{\leftarrow}$         | $\text{HCO}_3^- + \text{OGm}$ |
| CIm                             | $\frac{\nu_{\text{TCA\_CIm\_OGm}}}{\leftarrow}$         | $\text{CO}_2 + \text{OGm}$    |
| FUm                             | $\frac{\nu_{\text{TCA\_FUm\_MAm}}}{\leftarrow}$         | MAm                           |
| MAm                             | $\frac{\nu_{\text{TCA\_MAm\_OAm}}}{\leftarrow}$         | OAm                           |
| MAm                             | $\frac{\nu_{\text{TCA\_MAm\_PYm}}}{\leftarrow}$         | $\text{CO}_2 + \text{PYm}$    |
| AcCoAm + OAm                    | $\frac{\nu_{\text{TCA\_OAm\_AcCoAm\_CIm}}}{\leftarrow}$ | CIm                           |
| OGm                             | $\frac{\nu_{\text{TCA\_OGm\_SUCoAm}}}{\leftarrow}$      | $\text{CO}_2 + \text{SUCoAm}$ |
| PYm                             | $\frac{\nu_{\text{TCA\_PYm\_AcCoAm}}}{\leftarrow}$      | AcCoAm + $\text{CO}_2$        |
| SUCoAm                          | $\frac{\nu_{\text{TCA\_SUCoAm\_SUM}}}{\leftarrow}$      | SUm                           |

table continues ...

Table 2: (continued)

| Gene | Reaction/flux                                 |     |
|------|-----------------------------------------------|-----|
| SUm  | $\frac{\nu_{TCA.SUm.FUm}}{\nu_{TCA.SUm.FUm}}$ | FUm |

### 3 Symbolic solution of the steady state problem

#### 3.1 Flux relations

Cytosolic flux relations:

$$\nu_{AAo\_ACo} = \nu_{AcCoA_{out}} - \nu_{B\_PY\_AcCoA\_LEU\_M} - \nu_{B\_THR\_GLY} - \nu_{IOSm\_IOSo} + \nu_{LEU_{out}} + \nu_{LYS_{out}}$$

$$\nu_{ACo\_AcCoAo} = \nu_{AcCoA_{out}} - \nu_{B\_PY\_AcCoA\_LEU\_M} - \nu_{IOSm\_IOSo} + \nu_{LEU_{out}} + \nu_{LYS_{out}} + \nu_{MET_{out}}$$

$$\nu_{BCo\_CPo.01} = \nu_{US\_C\_ASP\_AS}$$

$$\nu_{BCo\_CPo.02} = \nu_{US\_C\_ASP\_AS}$$

$$\nu_{B\_AC.01} = \nu_{MET_{out}}$$

$$\nu_{B\_ASP\_ASN} = \nu_{ASN_{out}}$$

$$\nu_{B\_ASP\_THR} = \nu_{B\_THR\_GLY} + \nu_{ILE_{out}} + \nu_{THR_{out}}$$

$$\nu_{B\_AcCoA.01} = \nu_{MET_{out}}$$

$$\nu_{B\_GLU\_GLN} = \nu_{B\_GLT} + \nu_{GLN_{out}} + \nu_{US\_C\_ASP\_AS}$$

$$\nu_{B\_GLU\_PRO} = \nu_{PRO_{out}}$$

$$\nu_{B\_GiiiP\_GLY} = -\nu_{B\_THR\_GLY} + \nu_{GLY_{out}}$$

$$\nu_{B\_GiiiP\_SER} = -\nu_{B\_THR\_GLY} + \nu_{GLY_{out}} + \nu_{SER_{out}} + \nu_{TRP_{out}}$$

$$\nu_{B\_LYS\_C1} = \nu_{LYS_{out}}$$

$$\nu_{B\_LYS\_C2} = \nu_{LYS_{out}}$$

$$\nu_{B\_OA\_AcCoA\_MET} = \nu_{MET_{out}}$$

$$\nu_{B\_OAo\_ASP.01} = \nu_{ASN_{out}} + \nu_{ASP_{out}} - \nu_{ASPm\_ASPo} + \nu_{B\_THR\_GLY} + \nu_{ILE_{out}} + \nu_{MET_{out}} + \nu_{THR_{out}} + \nu_{US\_C\_ASP\_AS}$$

$$\nu_{B\_OAo\_ASP.02} = \nu_{ASN_{out}} + \nu_{ASP_{out}} - \nu_{ASPm\_ASPo} + \nu_{B\_THR\_GLY} + \nu_{ILE_{out}} + \nu_{MET_{out}} + \nu_{THR_{out}} + \nu_{US\_C\_ASP\_AS}$$

$$\nu_{B\_OG\_GLU\_C} = \nu_{ALA_{out}} + \nu_{ASN_{out}} + \nu_{ASP_{out}} - \nu_{ASPm\_ASPo} - \nu_{B\_PY\_ALA\_M1} + \nu_{B\_THR\_GLY} + \nu_{ILE_{out}} - \nu_{LYS_{out}} + \nu_{MET_{out}} - \nu_{OGo\_OGm} + \nu_{THR_{out}} + \nu_{US\_C\_ASP\_AS}$$

$$\nu_{B\_PEP.01} = \nu_{PHE_{out}} + \nu_{TRP_{out}} + \nu_{TYR_{out}}$$

$$\nu_{B\_PEP\_EivP.01} = \nu_{PHE_{out}} + \nu_{TRP_{out}} + \nu_{TYR_{out}}$$

$$\nu_{B\_PEP\_EivP\_PHE} = \nu_{PHE_{out}}$$

$$\nu_{B\_PEP\_EivP\_TRP.01} = \nu_{TRP_{out}}$$

$$\nu_{B\_PEP\_EivP\_TRP.02} = \nu_{TRP_{out}}$$

$$\nu_{B\_PEP\_EivP\_TRP.03} = \nu_{TRP_{out}}$$

$$\nu_{B\_PEP\_EivP\_TRP\_04} = \nu_{TRP\_out}$$

$$\nu_{B\_PEP\_EivP\_TRP\_05} = \nu_{TRP\_out}$$

$$\nu_{B\_PEP\_EivP\_TYR} = \nu_{TYR\_out}$$

$$\nu_{B\_PY\_ALA\_C1} = \nu_{ALA\_out} - \nu_{B\_PY\_ALA\_M1}$$

$$\nu_{B\_PY\_ALA\_C2} = \nu_{ALA\_out} - \nu_{B\_PY\_ALA\_M1}$$

$$\nu_{B\_PY\_AcCoA\_C} = -\nu_{B\_PY\_AcCoA\_LEU\_M} - \nu_{IOSm\_IOSo} + \nu_{LEU\_out}$$

$$\nu_{B\_PY\_AcCoA\_LEU\_C} = -\nu_{B\_PY\_AcCoA\_LEU\_M} + \nu_{LEU\_out}$$

$$\nu_{B\_PY\_VAL\_C} = -\nu_{B\_PY\_VAL\_M} + \nu_{VAL\_out}$$

$$\nu_{B\_RvP\_HIS} = \nu_{HIS\_out}$$

$$\nu_{CD\_BC} = \nu_{ARG\_out} + \nu_{ASN\_out} + \nu_{ASP\_out} + \nu_{B\_THR\_GLY} + \nu_{GLN\_out} + \nu_{GLU\_out} + \nu_{HIS\_out} + \nu_{ILE\_out} + \nu_{LYS\_out} + 2\nu_{MET\_out} + \nu_{OA\_PEP} + \nu_{OA\_out} + \nu_{PRO\_out} + \nu_{TCA\_MAm\_PYm} + \nu_{THR\_out} + \nu_{US\_C\_ASP\_AS}$$

$$\nu_{FviP\_GP\_GiiiP} = -\nu_{FviP\_out} + \nu_{GLin} - 1/3\nu_{GviP\_RLvP} - \nu_{GviP\_out} - 2/3\nu_{HIS\_out} - 1/3\nu_{PHE\_out} - 2/3\nu_{RvP\_out} - \nu_{TRP\_out} - 1/3\nu_{TYR\_out}$$

$$\nu_{GLUo\_OGo\_01} = \nu_{ALA\_out} + \nu_{ASN\_out} + \nu_{ASP\_out} - \nu_{ASPm\_ASPo} - \nu_{B\_PY\_ALA\_M1} + \nu_{B\_THR\_GLY} + \nu_{ILE\_out} + \nu_{MET\_out} + \nu_{THR\_out} + \nu_{US\_C\_ASP\_AS}$$

$$\nu_{GLUo\_OGo\_02} = \nu_{ALA\_out} + \nu_{ASN\_out} + \nu_{ASP\_out} - \nu_{ASPm\_ASPo} - \nu_{B\_PY\_ALA\_M1} + \nu_{B\_THR\_GLY} + \nu_{ILE\_out} + \nu_{MET\_out} + \nu_{THR\_out} + \nu_{US\_C\_ASP\_AS}$$

$$\nu_{GL\_GviP} = \nu_{GLin}$$

$$\nu_{GP\_GiiiP} = -\nu_{FviP\_out} + \nu_{GLin} - 1/3\nu_{GviP\_RLvP} - \nu_{GviP\_out} - 2/3\nu_{HIS\_out} - 1/3\nu_{PHE\_out} - 2/3\nu_{RvP\_out} - \nu_{TRP\_out} - 1/3\nu_{TYR\_out}$$

$$\nu_{GiiiP\_PEP} = \nu_{B\_THR\_GLY} - 2\nu_{FviP\_out} - \nu_{GLY\_out} + 2\nu_{GLin} - \nu_{GiiiP\_out} - 1/3\nu_{GviP\_RLvP} - 2\nu_{GviP\_out} - 5/3\nu_{HIS\_out} - 4/3\nu_{PHE\_out} - 5/3\nu_{RvP\_out} - \nu_{SER\_out} - 3\nu_{TRP\_out} - 4/3\nu_{TYR\_out}$$

$$\nu_{GviP\_FviP} = \nu_{GLin} - \nu_{GviP\_RLvP} - \nu_{GviP\_out}$$

$$\nu_{PEP\_PY} = \nu_{B\_THR\_GLY} - 2\nu_{FviP\_out} - \nu_{GLY\_out} + 2\nu_{GLin} - \nu_{GiiiP\_out} - 1/3\nu_{GviP\_RLvP} - 2\nu_{GviP\_out} - 5/3\nu_{HIS\_out} + \nu_{OA\_PEP} - 10/3\nu_{PHE\_out} - 5/3\nu_{RvP\_out} - \nu_{SER\_out} - 5\nu_{TRP\_out} - 10/3\nu_{TYR\_out}$$

$$\nu_{PPP\_FviP\_EivP\_SviiP\_GiiiP\_01} = 1/3\nu_{GviP\_RLvP} - 1/3\nu_{HIS\_out} + 1/3\nu_{PHE\_out} - 1/3\nu_{RvP\_out} + 1/3\nu_{TYR\_out}$$

$$\nu_{PPP\_FviP\_EivP\_SviiP\_GiiiP\_02} = 1/3\nu_{GviP\_RLvP} - 1/3\nu_{HIS\_out} + 1/3\nu_{PHE\_out} - 1/3\nu_{RvP\_out} + 1/3\nu_{TYR\_out}$$

$$\nu_{PPP\_FviP\_GiiiP\_XvP\_EivP\_01} = -1/3\nu_{GviP\_RLvP} + 1/3\nu_{HIS\_out} + 2/3\nu_{PHE\_out} + 1/3\nu_{RvP\_out} + \nu_{TRP\_out} + 2/3\nu_{TYR\_out}$$

$$\nu_{PPP\_FviP\_GiiiP\_XvP\_EivP\_02} = -1/3\nu_{GviP\_RLvP} + 1/3\nu_{HIS\_out} + 2/3\nu_{PHE\_out} + 1/3\nu_{RvP\_out} + \nu_{TRP\_out} + 2/3\nu_{TYR\_out}$$

$$\nu_{PPP\_SviiP\_GiiiP\_XvP\_RvP\_01} = 1/3\nu_{GviP\_RLvP} - 1/3\nu_{HIS_{out}} + 1/3\nu_{PHE_{out}} - 1/3\nu_{RvP_{out}} + 1/3\nu_{TYR_{out}}$$

$$\nu_{PPP\_SviiP\_GiiiP\_XvP\_RvP\_02} = 1/3\nu_{GviP\_RLvP} - 1/3\nu_{HIS_{out}} + 1/3\nu_{PHE_{out}} - 1/3\nu_{RvP_{out}} + 1/3\nu_{TYR_{out}}$$

$$\nu_{PYo\_OAO} = \nu_{ARG_{out}} + \nu_{ASN_{out}} + \nu_{ASP_{out}} + \nu_{B\_THR\_GLY} + \nu_{GLN_{out}} + \nu_{GLU_{out}} + \nu_{ILE_{out}} + \nu_{LYS_{out}} + \nu_{MET_{out}} + \nu_{OA\_PEP} + \nu_{OA_{out}} + \nu_{PRO_{out}} + \nu_{TCA\_MAM\_PYm} + \nu_{THR_{out}}$$

$$\nu_{RLvP\_RvP} = 1/3\nu_{GviP\_RLvP} + 2/3\nu_{HIS_{out}} + 1/3\nu_{PHE_{out}} + 2/3\nu_{RvP_{out}} + \nu_{TRP_{out}} + 1/3\nu_{TYR_{out}}$$

$$\nu_{US\_ARG\_OR} = -\nu_{ARG_{out}} + \nu_{US\_C\_ASP\_AS}$$

$$\nu_{US\_AS\_FU\_ARG} = \nu_{US\_C\_ASP\_AS}$$

$$\nu_{US\_OR\_C} = \nu_{US\_C\_ASP\_AS}$$

$$\nu_{XvP\_RLvP} = -2/3\nu_{GviP\_RLvP} + 2/3\nu_{HIS_{out}} + 1/3\nu_{PHE_{out}} + 2/3\nu_{RvP_{out}} + \nu_{TRP_{out}} + 1/3\nu_{TYR_{out}}$$

### Transport relations:

$$\begin{aligned} \nu_{CO_2_{out}} = & -3\nu_{ALA_{out}} - 6\nu_{ARG_{out}} - 4\nu_{ASN_{out}} - 4\nu_{ASP_{out}} - 2\nu_{AcCoA_{out}} - 6\nu_{FviP_{out}} - 5\nu_{GLN_{out}} - \\ & 5\nu_{GLU_{out}} - 2\nu_{GLY_{out}} + 6\nu_{GL_{in}} - 3\nu_{GiiiP_{out}} - 6\nu_{GviP_{out}} - 6\nu_{HIS_{out}} - 6\nu_{ILE_{out}} - 6\nu_{LEU_{out}} - 6\nu_{LYS_{out}} - \\ & 5\nu_{MET_{out}} - 4\nu_{OA_{out}} - 9\nu_{PHE_{out}} - 5\nu_{PRO_{out}} - 5\nu_{RvP_{out}} - 3\nu_{SER_{out}} - 4\nu_{THR_{out}} - 11\nu_{TRP_{out}} - \\ & 9\nu_{TYR_{out}} - 5\nu_{VAL_{out}} \end{aligned}$$

### Cytosolic-mitochondrial transport relations:

$$\nu_{AAo\_AAm} = -\nu_{AcCoA_{out}} + \nu_{B\_PY\_AcCoA\_LEU\_M} + \nu_{B\_THR\_GLY} + \nu_{IOSm\_IOSo} - \nu_{LEU_{out}} - \nu_{LYS_{out}} + \nu_{PYo\_AAo}$$

$$\nu_{ALAm\_ALAO} = \nu_{B\_PY\_ALA\_M1}$$

$$\begin{aligned} \nu_{CDm\_CDO} = & -3\nu_{ALA_{out}} - 4\nu_{ARG_{out}} - 3\nu_{ASN_{out}} - 3\nu_{ASP_{out}} - 2\nu_{AcCoA_{out}} + \nu_{B\_PY\_AcCoA\_LEU\_M} + \\ & 2\nu_{B\_THR\_GLY} - 6\nu_{FviP_{out}} - 4\nu_{GLN_{out}} - 4\nu_{GLU_{out}} - 3\nu_{GLY_{out}} + 6\nu_{GL_{in}} - 3\nu_{GiiiP_{out}} - \nu_{GviP\_RLvP} - \\ & 6\nu_{GviP_{out}} - 5\nu_{HIS_{out}} - 5\nu_{ILE_{out}} - 7\nu_{LEU_{out}} - 6\nu_{LYS_{out}} - 3\nu_{MET_{out}} - 3\nu_{OA_{out}} - 10\nu_{PHE_{out}} - 4\nu_{PRO_{out}} - \\ & \nu_{PYo\_AAo} - 5\nu_{RvP_{out}} - 3\nu_{SER_{out}} + \nu_{TCA\_MAM\_PYm} - 3\nu_{THR_{out}} - 12\nu_{TRP_{out}} - 10\nu_{TYR_{out}} - 5\nu_{VAL_{out}} \end{aligned}$$

$$\nu_{FUo\_FUm} = \nu_{US\_C\_ASP\_AS}$$

$$\nu_{GLNo\_GLNm} = \nu_{B\_GLT}$$

$$\nu_{GLUm\_GLUo} = \nu_{B\_GLT} + \nu_{GLN_{out}} + \nu_{GLU_{out}} + \nu_{LYS_{out}} + \nu_{OGo\_OGm} + \nu_{PRO_{out}}$$

$$\nu_{ILEm\_ILEo} = \nu_{ILE_{out}}$$

$$\nu_{LEUm\_LEUo} = \nu_{B\_PY\_AcCoA\_LEU\_M}$$

$$\nu_{MOm\_MOo} = -\nu_{B\_PY\_AcCoA\_LEU\_M} - \nu_{B\_PY\_VAL\_M} - \nu_{IOSm\_IOSo} + \nu_{LEU_{out}} + \nu_{VAL_{out}}$$

$$\nu_{OAO\_OAm} = \nu_{ARG_{out}} + \nu_{ASPm\_ASPo} + \nu_{GLN_{out}} + \nu_{GLU_{out}} + \nu_{LYS_{out}} + \nu_{PRO_{out}} + \nu_{TCA\_MAM\_PYm} - \nu_{US\_C\_ASP\_AS}$$

$$\nu_{ORm\_ORo} = \nu_{ARG_{out}}$$

$$\nu_{PYo\_PYm} = -\nu_{ALA_{out}} - \nu_{ARG_{out}} - \nu_{ASN_{out}} - \nu_{ASP_{out}} + \nu_{B\_PY\_ALA\_M1} - 2\nu_{FviP_{out}} - \nu_{GLN_{out}} -$$

$$\begin{aligned} & \nu_{\text{GLU}_{\text{out}}} - \nu_{\text{GLY}_{\text{out}}} + 2\nu_{\text{GL}_{\text{in}}} - \nu_{\text{GiiiP}_{\text{out}}} - 1/3\nu_{\text{GviP}_{\text{RLvP}}} - 2\nu_{\text{GviP}_{\text{out}}} - 5/3\nu_{\text{HIS}_{\text{out}}} - \nu_{\text{ILE}_{\text{out}}} - \nu_{\text{LYS}_{\text{out}}} - \\ & \nu_{\text{MET}_{\text{out}}} - \nu_{\text{OA}_{\text{out}}} - 10/3\nu_{\text{PHE}_{\text{out}}} - \nu_{\text{PRO}_{\text{out}}} - \nu_{\text{PYo\_AAo}} - 5/3\nu_{\text{RvP}_{\text{out}}} - \nu_{\text{SER}_{\text{out}}} - \nu_{\text{TCA\_MAM\_PYm}} - \\ & \nu_{\text{THR}_{\text{out}}} - 4\nu_{\text{TRP}_{\text{out}}} - 10/3\nu_{\text{TYR}_{\text{out}}} \end{aligned}$$

$$\nu_{\text{THRo\_THRm}} = \nu_{\text{ILE}_{\text{out}}}$$

$$\nu_{\text{VALm\_VALo}} = \nu_{\text{B\_PY\_VALM}}$$

### Mitochondrial flux relations:

$$\nu_{\text{AAm\_ACm}} = -\nu_{\text{AcCoA}_{\text{out}}} + \nu_{\text{B\_PY\_AcCoA\_LEU\_M}} + \nu_{\text{B\_THR\_GLY}} + \nu_{\text{IOSm\_IOSo}} - \nu_{\text{LEU}_{\text{out}}} - \nu_{\text{LYS}_{\text{out}}} + \nu_{\text{PYo\_AAo}}$$

$$\nu_{\text{ACm\_AcCoAm}} = -\nu_{\text{AcCoA}_{\text{out}}} + \nu_{\text{B\_PY\_AcCoA\_LEU\_M}} + \nu_{\text{B\_THR\_GLY}} + \nu_{\text{IOSm\_IOSo}} - \nu_{\text{LEU}_{\text{out}}} - \nu_{\text{LYS}_{\text{out}}} + \nu_{\text{PYo\_AAo}}$$

$$\nu_{\text{B\_GLU\_OR}} = \nu_{\text{ARG}_{\text{out}}}$$

$$\nu_{\text{B\_OAm\_ASP\_01}} = \nu_{\text{ASPm\_ASPo}}$$

$$\nu_{\text{B\_OAm\_ASP\_02}} = \nu_{\text{ASPm\_ASPo}}$$

$$\nu_{\text{B\_OG\_GLU\_M}} = \nu_{\text{ARG}_{\text{out}}} + \nu_{\text{ASPm\_ASPo}} - \nu_{\text{B\_GLT}} + \nu_{\text{B\_PY\_ALA\_M1}} + \nu_{\text{GLN}_{\text{out}}} + \nu_{\text{GLU}_{\text{out}}} + \nu_{\text{LYS}_{\text{out}}} + \nu_{\text{OGo\_OGm}} + \nu_{\text{PRO}_{\text{out}}}$$

$$\nu_{\text{B\_PY\_ALA\_M2}} = \nu_{\text{B\_PY\_ALA\_M1}}$$

$$\nu_{\text{B\_PY\_AcCoA\_M}} = \nu_{\text{B\_PY\_AcCoA\_LEU\_M}} + \nu_{\text{IOSm\_IOSo}}$$

$$\nu_{\text{B\_PY\_M1}} = \nu_{\text{ILE}_{\text{out}}} + \nu_{\text{LEU}_{\text{out}}} + \nu_{\text{VAL}_{\text{out}}}$$

$$\nu_{\text{B\_PY\_M2}} = \nu_{\text{LEU}_{\text{out}}} + \nu_{\text{VAL}_{\text{out}}}$$

$$\nu_{\text{B\_PY\_THR\_ILE}} = \nu_{\text{ILE}_{\text{out}}}$$

$$\nu_{\text{GLUm\_OGm\_01}} = \nu_{\text{ASPm\_ASPo}} + \nu_{\text{B\_PY\_ALA\_M1}}$$

$$\nu_{\text{GLUm\_OGm\_02}} = \nu_{\text{ASPm\_ASPo}} + \nu_{\text{B\_PY\_ALA\_M1}}$$

$$\begin{aligned} \nu_{\text{TCA\_CIm\_OGm}} = & -\nu_{\text{ALA}_{\text{out}}} - \nu_{\text{ARG}_{\text{out}}} - \nu_{\text{ASN}_{\text{out}}} - \nu_{\text{ASP}_{\text{out}}} - \nu_{\text{AcCoA}_{\text{out}}} + \nu_{\text{B\_THR\_GLY}} - 2\nu_{\text{FviP}_{\text{out}}} - \\ & \nu_{\text{GLN}_{\text{out}}} - \nu_{\text{GLU}_{\text{out}}} - \nu_{\text{GLY}_{\text{out}}} + 2\nu_{\text{GL}_{\text{in}}} - \nu_{\text{GiiiP}_{\text{out}}} - 1/3\nu_{\text{GviP}_{\text{RLvP}}} - 2\nu_{\text{GviP}_{\text{out}}} - 5/3\nu_{\text{HIS}_{\text{out}}} - 2\nu_{\text{ILE}_{\text{out}}} - \\ & 3\nu_{\text{LEU}_{\text{out}}} - 2\nu_{\text{LYS}_{\text{out}}} - \nu_{\text{MET}_{\text{out}}} - \nu_{\text{OA}_{\text{out}}} - 10/3\nu_{\text{PHE}_{\text{out}}} - \nu_{\text{PRO}_{\text{out}}} - 5/3\nu_{\text{RvP}_{\text{out}}} - \nu_{\text{SER}_{\text{out}}} - \nu_{\text{THR}_{\text{out}}} - \\ & 4\nu_{\text{TRP}_{\text{out}}} - 10/3\nu_{\text{TYR}_{\text{out}}} - 2\nu_{\text{VAL}_{\text{out}}} \end{aligned}$$

$$\begin{aligned} \nu_{\text{TCA\_FUm\_MAM}} = & -\nu_{\text{ALA}_{\text{out}}} - 2\nu_{\text{ARG}_{\text{out}}} - \nu_{\text{ASN}_{\text{out}}} - \nu_{\text{ASP}_{\text{out}}} - \nu_{\text{AcCoA}_{\text{out}}} + \nu_{\text{B\_THR\_GLY}} - \\ & 2\nu_{\text{FviP}_{\text{out}}} - 2\nu_{\text{GLN}_{\text{out}}} - 2\nu_{\text{GLU}_{\text{out}}} - \nu_{\text{GLY}_{\text{out}}} + 2\nu_{\text{GL}_{\text{in}}} - \nu_{\text{GiiiP}_{\text{out}}} - 1/3\nu_{\text{GviP}_{\text{RLvP}}} - 2\nu_{\text{GviP}_{\text{out}}} - \\ & 5/3\nu_{\text{HIS}_{\text{out}}} - 2\nu_{\text{ILE}_{\text{out}}} - 3\nu_{\text{LEU}_{\text{out}}} - 3\nu_{\text{LYS}_{\text{out}}} - \nu_{\text{MET}_{\text{out}}} - \nu_{\text{OA}_{\text{out}}} - 10/3\nu_{\text{PHE}_{\text{out}}} - 2\nu_{\text{PRO}_{\text{out}}} - \\ & 5/3\nu_{\text{RvP}_{\text{out}}} - \nu_{\text{SER}_{\text{out}}} - \nu_{\text{THR}_{\text{out}}} - 4\nu_{\text{TRP}_{\text{out}}} - 10/3\nu_{\text{TYR}_{\text{out}}} + \nu_{\text{US\_C\_ASP\_AS}} - 2\nu_{\text{VAL}_{\text{out}}} \end{aligned}$$

$$\begin{aligned} \nu_{\text{TCA\_MAM\_OAm}} = & -\nu_{\text{ALA}_{\text{out}}} - 2\nu_{\text{ARG}_{\text{out}}} - \nu_{\text{ASN}_{\text{out}}} - \nu_{\text{ASP}_{\text{out}}} - \nu_{\text{AcCoA}_{\text{out}}} + \nu_{\text{B\_THR\_GLY}} - \\ & 2\nu_{\text{FviP}_{\text{out}}} - 2\nu_{\text{GLN}_{\text{out}}} - 2\nu_{\text{GLU}_{\text{out}}} - \nu_{\text{GLY}_{\text{out}}} + 2\nu_{\text{GL}_{\text{in}}} - \nu_{\text{GiiiP}_{\text{out}}} - 1/3\nu_{\text{GviP}_{\text{RLvP}}} - 2\nu_{\text{GviP}_{\text{out}}} - \\ & 5/3\nu_{\text{HIS}_{\text{out}}} - 2\nu_{\text{ILE}_{\text{out}}} - 3\nu_{\text{LEU}_{\text{out}}} - 3\nu_{\text{LYS}_{\text{out}}} - \nu_{\text{MET}_{\text{out}}} - \nu_{\text{OA}_{\text{out}}} - 10/3\nu_{\text{PHE}_{\text{out}}} - 2\nu_{\text{PRO}_{\text{out}}} \end{aligned}$$

$$5/3\nu_{RvP_{out}} - \nu_{SER_{out}} - \nu_{TCA\_MAM\_PYm} - \nu_{THR_{out}} - 4\nu_{TRP_{out}} - 10/3\nu_{TYR_{out}} + \nu_{US\_C\_ASP\_AS} - 2\nu_{VAL_{out}}$$

$$\nu_{TCA\_OAm\_AcCoAm\_CIm} = -\nu_{ALA_{out}} - \nu_{ARG_{out}} - \nu_{ASN_{out}} - \nu_{ASP_{out}} - \nu_{AcCoA_{out}} + \nu_{B\_THR\_GLY} - 2\nu_{FviP_{out}} - \nu_{GLN_{out}} - \nu_{GLU_{out}} - \nu_{GLY_{out}} + 2\nu_{GL_{in}} - \nu_{GiiiP_{out}} - 1/3\nu_{GviP\_RLvP} - 2\nu_{GviP_{out}} - 5/3\nu_{HIS_{out}} - 2\nu_{ILE_{out}} - 3\nu_{LEU_{out}} - 2\nu_{LYS_{out}} - \nu_{MET_{out}} - \nu_{OA_{out}} - 10/3\nu_{PHE_{out}} - \nu_{PRO_{out}} - 5/3\nu_{RvP_{out}} - \nu_{SER_{out}} - \nu_{THR_{out}} - 4\nu_{TRP_{out}} - 10/3\nu_{TYR_{out}} - 2\nu_{VAL_{out}}$$

$$\nu_{TCA\_OGm\_SUCoAm} = -\nu_{ALA_{out}} - 2\nu_{ARG_{out}} - \nu_{ASN_{out}} - \nu_{ASP_{out}} - \nu_{AcCoA_{out}} + \nu_{B\_THR\_GLY} - 2\nu_{FviP_{out}} - 2\nu_{GLN_{out}} - 2\nu_{GLU_{out}} - \nu_{GLY_{out}} + 2\nu_{GL_{in}} - \nu_{GiiiP_{out}} - 1/3\nu_{GviP\_RLvP} - 2\nu_{GviP_{out}} - 5/3\nu_{HIS_{out}} - 2\nu_{ILE_{out}} - 3\nu_{LEU_{out}} - 3\nu_{LYS_{out}} - \nu_{MET_{out}} - \nu_{OA_{out}} - 10/3\nu_{PHE_{out}} - 2\nu_{PRO_{out}} - 5/3\nu_{RvP_{out}} - \nu_{SER_{out}} - \nu_{THR_{out}} - 4\nu_{TRP_{out}} - 10/3\nu_{TYR_{out}} - 2\nu_{VAL_{out}}$$

$$\nu_{TCA\_PYm\_AcCoAm} = -\nu_{ALA_{out}} - \nu_{ARG_{out}} - \nu_{ASN_{out}} - \nu_{ASP_{out}} - 2\nu_{FviP_{out}} - \nu_{GLN_{out}} - \nu_{GLU_{out}} - \nu_{GLY_{out}} + 2\nu_{GL_{in}} - \nu_{GiiiP_{out}} - 1/3\nu_{GviP\_RLvP} - 2\nu_{GviP_{out}} - 5/3\nu_{HIS_{out}} - 2\nu_{ILE_{out}} - 2\nu_{LEU_{out}} - \nu_{LYS_{out}} - \nu_{MET_{out}} - \nu_{OA_{out}} - 10/3\nu_{PHE_{out}} - \nu_{PRO_{out}} - \nu_{PYo\_AAo} - 5/3\nu_{RvP_{out}} - \nu_{SER_{out}} - \nu_{THR_{out}} - 4\nu_{TRP_{out}} - 10/3\nu_{TYR_{out}} - 2\nu_{VAL_{out}}$$

$$\nu_{TCA\_SUCoAm\_SUM} = -\nu_{ALA_{out}} - 2\nu_{ARG_{out}} - \nu_{ASN_{out}} - \nu_{ASP_{out}} - \nu_{AcCoA_{out}} + \nu_{B\_THR\_GLY} - 2\nu_{FviP_{out}} - 2\nu_{GLN_{out}} - 2\nu_{GLU_{out}} - \nu_{GLY_{out}} + 2\nu_{GL_{in}} - \nu_{GiiiP_{out}} - 1/3\nu_{GviP\_RLvP} - 2\nu_{GviP_{out}} - 5/3\nu_{HIS_{out}} - 2\nu_{ILE_{out}} - 3\nu_{LEU_{out}} - 3\nu_{LYS_{out}} - \nu_{MET_{out}} - \nu_{OA_{out}} - 10/3\nu_{PHE_{out}} - 2\nu_{PRO_{out}} - 5/3\nu_{RvP_{out}} - \nu_{SER_{out}} - \nu_{THR_{out}} - 4\nu_{TRP_{out}} - 10/3\nu_{TYR_{out}} - 2\nu_{VAL_{out}}$$

$$\nu_{TCA\_SUM\_FUM} = -\nu_{ALA_{out}} - 2\nu_{ARG_{out}} - \nu_{ASN_{out}} - \nu_{ASP_{out}} - \nu_{AcCoA_{out}} + \nu_{B\_THR\_GLY} - 2\nu_{FviP_{out}} - 2\nu_{GLN_{out}} - 2\nu_{GLU_{out}} - \nu_{GLY_{out}} + 2\nu_{GL_{in}} - \nu_{GiiiP_{out}} - 1/3\nu_{GviP\_RLvP} - 2\nu_{GviP_{out}} - 5/3\nu_{HIS_{out}} - 2\nu_{ILE_{out}} - 3\nu_{LEU_{out}} - 3\nu_{LYS_{out}} - \nu_{MET_{out}} - \nu_{OA_{out}} - 10/3\nu_{PHE_{out}} - 2\nu_{PRO_{out}} - 5/3\nu_{RvP_{out}} - \nu_{SER_{out}} - \nu_{THR_{out}} - 4\nu_{TRP_{out}} - 10/3\nu_{TYR_{out}} - 2\nu_{VAL_{out}}$$

### 3.2 Constraints

The following constraints are implications of irreversibility conditions (positiveness of uni-directional fluxes) in the system of reactions:

$$3\nu_{ALA_{out}} + 3\nu_{ARG_{out}} + 3\nu_{ASN_{out}} + 3\nu_{ASP_{out}} + 6\nu_{FviP_{out}} + 3\nu_{GLN_{out}} + 3\nu_{GLU_{out}} + 3\nu_{GLY_{out}} + 3\nu_{GiiiP_{out}} + \nu_{GviP\_RLvP} + 6\nu_{GviP_{out}} + 5\nu_{HIS_{out}} + 6\nu_{ILE_{out}} + 6\nu_{LEU_{out}} + 3\nu_{LYS_{out}} + 3\nu_{MET_{out}} + 3\nu_{OA_{out}} + 10\nu_{PHE_{out}} + 3\nu_{PRO_{out}} + 3\nu_{PYo\_AAo} + 5\nu_{RvP_{out}} + 3\nu_{SER_{out}} + 3\nu_{THR_{out}} + 12\nu_{TRP_{out}} + 10\nu_{TYR_{out}} + 6\nu_{VAL_{out}} \leq 6\nu_{GL_{in}}$$

$$3\nu_{ALA_{out}} + 6\nu_{ARG_{out}} + 3\nu_{ASN_{out}} + 3\nu_{ASP_{out}} + 3\nu_{AcCoA_{out}} + 6\nu_{FviP_{out}} + 6\nu_{GLN_{out}} + 6\nu_{GLU_{out}} + 3\nu_{GLY_{out}} + 3\nu_{GiiiP_{out}} + \nu_{GviP\_RLvP} + 6\nu_{GviP_{out}} + 5\nu_{HIS_{out}} + 6\nu_{ILE_{out}} + 9\nu_{LEU_{out}} + 9\nu_{LYS_{out}} + 3\nu_{MET_{out}} + 3\nu_{OA_{out}} + 10\nu_{PHE_{out}} + 6\nu_{PRO_{out}} + 5\nu_{RvP_{out}} + 3\nu_{SER_{out}} + 3\nu_{THR_{out}} + 12\nu_{TRP_{out}} + 10\nu_{TYR_{out}} + 6\nu_{VAL_{out}} \leq 3\nu_{B\_THR\_GLY} + 6\nu_{GL_{in}}$$

$$3/2\nu_{ALA_{out}} + 3\nu_{ARG_{out}} + 2\nu_{ASN_{out}} + 2\nu_{ASP_{out}} + \nu_{AcCoA_{out}} + 3\nu_{FviP_{out}} + 5/2\nu_{GLN_{out}} + 5/2\nu_{GLU_{out}} + \nu_{GLY_{out}} + 3/2\nu_{GiiiP_{out}} + 3\nu_{GviP_{out}} + 3\nu_{HIS_{out}} + 3\nu_{ILE_{out}} + 3\nu_{LEU_{out}} + 3\nu_{LYS_{out}} + 5/2\nu_{MET_{out}} + 2\nu_{OA_{out}} + 9/2\nu_{PHE_{out}} + 5/2\nu_{PRO_{out}} + 5/2\nu_{RvP_{out}} + 3/2\nu_{SER_{out}} + 2\nu_{THR_{out}} + 11/2\nu_{TRP_{out}} + 9/2\nu_{TYR_{out}} + 5/2\nu_{VAL_{out}} \leq 3\nu_{GL_{in}}$$

$$\nu_{\text{ARG}_{\text{out}}} \leq \nu_{\text{US\_C\_ASP\_AS}}$$

$$\nu_{\text{B\_PY\_AcCoA\_LEU\_M}} \leq \nu_{\text{LEU}_{\text{out}}}$$

$$\nu_{\text{B\_THR\_GLY}} \leq \nu_{\text{GLY}_{\text{out}}}$$

#### 4 Values of independent fluxes used to generate Figure 1.

| External flux                     | Value (a.u.) | Internal flux                       | Value (a.u.) |
|-----------------------------------|--------------|-------------------------------------|--------------|
| $\nu_{\text{ALA}_{\text{out}}}$   | 2.77         | $\nu_{\text{ASPm\_ASPo}}$           | 2            |
| $\nu_{\text{ARG}_{\text{out}}}$   | 1.94         | $\nu_{\text{B\_GLT}}$               | 4            |
| $\nu_{\text{ASN}_{\text{out}}}$   | 0.82         | $\nu_{\text{B\_PY\_ALA\_M1}}$       | 1.0          |
| $\nu_{\text{ASP}_{\text{out}}}$   | 2.39         | $\nu_{\text{B\_PY\_AcCoA\_LEU\_M}}$ | 2            |
| $\nu_{\text{AcCoA}_{\text{out}}}$ | 0.3          | $\nu_{\text{B\_PY\_VAL\_M}}$        | 1            |
| $\nu_{\text{FviP}_{\text{out}}}$  | 11           | $\nu_{\text{B\_THR\_GLY}}$          | 0            |
| $\nu_{\text{GLN}_{\text{out}}}$   | 1.06         | $\nu_{\text{GviP\_RLvP}}$           | 5            |
| $\nu_{\text{GLU}_{\text{out}}}$   | 3.04         | $\nu_{\text{IOSm\_IOSo}}$           | 0            |
| $\nu_{\text{GLY}_{\text{out}}}$   | 1.17         | $\nu_{\text{OA\_PEP}}$              | 0            |
| $\nu_{\text{GL}_{\text{in}}}$     | 100          | $\nu_{\text{OGo\_OGm}}$             | 0            |
| $\nu_{\text{GiiiP}_{\text{out}}}$ | 0.45         | $\nu_{\text{PYo\_AAo}}$             | 10           |
| $\nu_{\text{GviP}_{\text{out}}}$  | 3.8          | $\nu_{\text{TCA\_MAm\_PYm}}$        | 0            |
| $\nu_{\text{HIS}_{\text{out}}}$   | 0.8          | $\nu_{\text{US\_C\_ASP\_AS}}$       | 2.5          |
| $\nu_{\text{ILE}_{\text{out}}}$   | 2.33         |                                     |              |
| $\nu_{\text{LEU}_{\text{out}}}$   | 3.57         |                                     |              |
| $\nu_{\text{LYS}_{\text{out}}}$   | 3.45         |                                     |              |
| $\nu_{\text{MET}_{\text{out}}}$   | 0.51         |                                     |              |
| $\nu_{\text{OA}_{\text{out}}}$    | 0.36         |                                     |              |
| $\nu_{\text{PHE}_{\text{out}}}$   | 2.43         |                                     |              |
| $\nu_{\text{PRO}_{\text{out}}}$   | 1.66         |                                     |              |
| $\nu_{\text{RvP}_{\text{out}}}$   | 2.6          |                                     |              |
| $\nu_{\text{SER}_{\text{out}}}$   | 1.12         |                                     |              |
| $\nu_{\text{THR}_{\text{out}}}$   | 1.54         |                                     |              |
| $\nu_{\text{TRP}_{\text{out}}}$   | 0.62         |                                     |              |
| $\nu_{\text{TYR}_{\text{out}}}$   | 1.84         |                                     |              |
| $\nu_{\text{VAL}_{\text{out}}}$   | 2.66         |                                     |              |

## 5 Symbolic solution of the steady state problem with measured values

### 5.1 Flux relations

Final flux values after substituting all specified independent flux values from the above Table are shown in bold.

**Cytosolic flux relations:**

$$\nu_{AAo\_ACo} = 7.320 - \nu_{B\_PY\_AcCoA\_LEU\_M} - \nu_{B\_THR\_GLY} - \nu_{IOsm\_IOSo} = \mathbf{5.320}$$

$$\nu_{ACo\_AcCoAo} = 7.830 - \nu_{B\_PY\_AcCoA\_LEU\_M} - \nu_{IOsm\_IOSo} = \mathbf{5.830}$$

$$\nu_{BCo\_CPo.01} = \nu_{US\_C\_ASP\_AS} = \mathbf{2.500}$$

$$\nu_{BCo\_CPo.02} = \nu_{US\_C\_ASP\_AS} = \mathbf{2.500}$$

$$\nu_{B\_AC.01} = 0.510 = \mathbf{0.510}$$

$$\nu_{B\_ASP\_ASN} = 0.820 = \mathbf{0.820}$$

$$\nu_{B\_ASP\_THR} = 3.870 + \nu_{B\_THR\_GLY} = \mathbf{3.870}$$

$$\nu_{B\_AcCoA.01} = 0.510 = \mathbf{0.510}$$

$$\nu_{B\_GLU\_GLN} = 1.060 + \nu_{B\_GLT} + \nu_{US\_C\_ASP\_AS} = \mathbf{7.560}$$

$$\nu_{B\_GLU\_PRO} = 1.660 = \mathbf{1.660}$$

$$\nu_{B\_GiiiP\_GLY} = 1.170 - \nu_{B\_THR\_GLY} = \mathbf{1.170}$$

$$\nu_{B\_GiiiP\_SER} = 2.910 - \nu_{B\_THR\_GLY} = \mathbf{2.910}$$

$$\nu_{B\_LYS\_C1} = 3.450 = \mathbf{3.450}$$

$$\nu_{B\_LYS\_C2} = 3.450 = \mathbf{3.450}$$

$$\nu_{B\_OA\_AcCoA\_MET} = 0.510 = \mathbf{0.510}$$

$$\nu_{B\_OAo\_ASP.01} = 7.590 - \nu_{ASPm\_ASPo} + \nu_{B\_THR\_GLY} + \nu_{US\_C\_ASP\_AS} = \mathbf{8.090}$$

$$\nu_{B\_OAo\_ASP.02} = 7.590 - \nu_{ASPm\_ASPo} + \nu_{B\_THR\_GLY} + \nu_{US\_C\_ASP\_AS} = \mathbf{8.090}$$

$$\nu_{B\_OG\_GLU\_C} = 6.910 - \nu_{ASPm\_ASPo} - \nu_{B\_PY\_ALA\_M1} + \nu_{B\_THR\_GLY} - \nu_{OGo\_OGm} + \nu_{US\_C\_ASP\_AS} = \mathbf{6.410}$$

$$\nu_{B\_PEP.01} = 4.890 = \mathbf{4.890}$$

$$\nu_{B\_PEP\_EivP.01} = 4.890 = \mathbf{4.890}$$

$$\nu_{B\_PEP\_EivP\_PHE} = 2.430 = \mathbf{2.430}$$

$$\nu_{B\_PEP\_EivP\_TRP.01} = 0.620 = \mathbf{0.620}$$

$$\nu_{B\_PEP\_EivP\_TRP.02} = 0.620 = \mathbf{0.620}$$

$$\nu_{B\_PEP\_EivP\_TRP.03} = 0.620 = \mathbf{0.620}$$

$$\begin{aligned}
\nu_{\text{B\_PEP\_EivP\_TRP\_04}} &= 0.620 = \mathbf{0.620} \\
\nu_{\text{B\_PEP\_EivP\_TRP\_05}} &= 0.620 = \mathbf{0.620} \\
\nu_{\text{B\_PEP\_EivP\_TYR}} &= 1.840 = \mathbf{1.840} \\
\nu_{\text{B\_PY\_ALA\_C1}} &= 2.770 - \nu_{\text{B\_PY\_ALA\_M1}} = \mathbf{1.770} \\
\nu_{\text{B\_PY\_ALA\_C2}} &= 2.770 - \nu_{\text{B\_PY\_ALA\_M1}} = \mathbf{1.770} \\
\nu_{\text{B\_PY\_AcCoA\_C}} &= 3.570 - \nu_{\text{B\_PY\_AcCoA\_LEU\_M}} - \nu_{\text{IOSm\_IOSo}} = \mathbf{1.570} \\
\nu_{\text{B\_PY\_AcCoA\_LEU\_C}} &= 3.570 - \nu_{\text{B\_PY\_AcCoA\_LEU\_M}} = \mathbf{1.570} \\
\nu_{\text{B\_PY\_VAL\_C}} &= 2.660 - \nu_{\text{B\_PY\_VAL\_M}} = \mathbf{1.660} \\
\nu_{\text{B\_RvP\_HIS}} &= 0.800 = \mathbf{0.800} \\
\nu_{\text{CD\_BC}} &= 20.410 + \nu_{\text{B\_THR\_GLY}} + \nu_{\text{OA\_PEP}} + \nu_{\text{TCA\_MAM\_PYm}} + \nu_{\text{US\_C\_ASP\_AS}} = \mathbf{22.910} \\
\nu_{\text{FviP\_GP\_GiiiP}} &= 80.890 - 1/3\nu_{\text{GviP\_RLvP}} = \mathbf{79.223} \\
\nu_{\text{GLUo\_OGOo\_01}} &= 10.360 - \nu_{\text{ASPm\_ASPo}} - \nu_{\text{B\_PY\_ALA\_M1}} + \nu_{\text{B\_THR\_GLY}} + \nu_{\text{US\_C\_ASP\_AS}} = \mathbf{9.860} \\
\nu_{\text{GLUo\_OGOo\_02}} &= 10.360 - \nu_{\text{ASPm\_ASPo}} - \nu_{\text{B\_PY\_ALA\_M1}} + \nu_{\text{B\_THR\_GLY}} + \nu_{\text{US\_C\_ASP\_AS}} = \mathbf{9.860} \\
\nu_{\text{GL\_GviP}} &= 100.000 = \mathbf{100.000} \\
\nu_{\text{GP\_GiiiP}} &= 80.890 - 1/3\nu_{\text{GviP\_RLvP}} = \mathbf{79.223} \\
\nu_{\text{GiiiP\_PEP}} &= 154.440 + \nu_{\text{B\_THR\_GLY}} - 1/3\nu_{\text{GviP\_RLvP}} = \mathbf{152.773} \\
\nu_{\text{GviP\_FviP}} &= 96.200 - \nu_{\text{GviP\_RLvP}} = \mathbf{91.200} \\
\nu_{\text{PEP\_PY}} &= 144.660 + \nu_{\text{B\_THR\_GLY}} - 1/3\nu_{\text{GviP\_RLvP}} + \nu_{\text{OA\_PEP}} = \mathbf{142.993} \\
\nu_{\text{PPP\_FviP\_EivP\_SviiP\_GiiiP\_01}} &= 0.290 + 1/3\nu_{\text{GviP\_RLvP}} = \mathbf{1.957} \\
\nu_{\text{PPP\_FviP\_EivP\_SviiP\_GiiiP\_02}} &= 0.290 + 1/3\nu_{\text{GviP\_RLvP}} = \mathbf{1.957} \\
\nu_{\text{PPP\_FviP\_GiiiP\_XvP\_EivP\_01}} &= 4.600 - 1/3\nu_{\text{GviP\_RLvP}} = \mathbf{2.933} \\
\nu_{\text{PPP\_FviP\_GiiiP\_XvP\_EivP\_02}} &= 4.600 - 1/3\nu_{\text{GviP\_RLvP}} = \mathbf{2.933} \\
\nu_{\text{PPP\_SviiP\_GiiiP\_XvP\_RvP\_01}} &= 0.290 + 1/3\nu_{\text{GviP\_RLvP}} = \mathbf{1.957} \\
\nu_{\text{PPP\_SviiP\_GiiiP\_XvP\_RvP\_02}} &= 0.290 + 1/3\nu_{\text{GviP\_RLvP}} = \mathbf{1.957} \\
\nu_{\text{PYo\_OAo}} &= 19.100 + \nu_{\text{B\_THR\_GLY}} + \nu_{\text{OA\_PEP}} + \nu_{\text{TCA\_MAM\_PYm}} = \mathbf{19.100} \\
\nu_{\text{RLvP\_RvP}} &= 4.310 + 1/3\nu_{\text{GviP\_RLvP}} = \mathbf{5.977} \\
\nu_{\text{US\_ARG\_OR}} &= -1.940 + \nu_{\text{US\_C\_ASP\_AS}} = \mathbf{0.560} \\
\nu_{\text{US\_AS\_FU\_ARG}} &= \nu_{\text{US\_C\_ASP\_AS}} = \mathbf{2.500}
\end{aligned}$$

$$\nu_{\text{US\_OR\_C}} = \nu_{\text{US\_C\_ASP\_AS}} = \mathbf{2.500}$$

$$\nu_{\text{XvP\_RLvP}} = 4.310 - 2/3\nu_{\text{GviP\_RLvP}} = \mathbf{0.977}$$

**Transport relations:**

$$\nu_{\text{CO}_2,\text{out}} = 299.360 = \mathbf{299.360}$$

**Cytosolic-mitochondrial transport relations:**

$$\nu_{\text{AAo\_AAm}} = -7.320 + \nu_{\text{B\_PY\_AcCoA\_LEU\_M}} + \nu_{\text{B\_THR\_GLY}} + \nu_{\text{IOSm\_IOSo}} + \nu_{\text{PYo\_AAo}} = \mathbf{4.680}$$

$$\nu_{\text{ALAm\_ALAo}} = \nu_{\text{B\_PY\_ALA\_M1}} = \mathbf{1.000}$$

$$\nu_{\text{CDm\_CDo}} = 308.630 + \nu_{\text{B\_PY\_AcCoA\_LEU\_M}} + 2\nu_{\text{B\_THR\_GLY}} - \nu_{\text{GviP\_RLvP}} - \nu_{\text{PYo\_AAo}} + \nu_{\text{TCA\_MAm\_PYm}} = \mathbf{295.630}$$

$$\nu_{\text{FUo\_FUm}} = \nu_{\text{US\_C\_ASP\_AS}} = \mathbf{2.500}$$

$$\nu_{\text{GLNo\_GLNm}} = \nu_{\text{B\_GLT}} = \mathbf{4.000}$$

$$\nu_{\text{GLUm\_GLUo}} = 9.210 + \nu_{\text{B\_GLT}} + \nu_{\text{OGo\_OGm}} = \mathbf{13.210}$$

$$\nu_{\text{ILEm\_ILEo}} = 2.330 = \mathbf{2.330}$$

$$\nu_{\text{LEUm\_LEUo}} = \nu_{\text{B\_PY\_AcCoA\_LEU\_M}} = \mathbf{2.000}$$

$$\nu_{\text{MOm\_MOo}} = 6.230 - \nu_{\text{B\_PY\_AcCoA\_LEU\_M}} - \nu_{\text{B\_PY\_VAL\_M}} - \nu_{\text{IOSm\_IOSo}} = \mathbf{3.230}$$

$$\nu_{\text{OAO\_OAm}} = 11.150 + \nu_{\text{ASPm\_ASPo}} + \nu_{\text{TCA\_MAm\_PYm}} - \nu_{\text{US\_C\_ASP\_AS}} = \mathbf{10.650}$$

$$\nu_{\text{ORm\_ORo}} = 1.940 = \mathbf{1.940}$$

$$\nu_{\text{PYo\_PYm}} = 123.410 + \nu_{\text{B\_PY\_ALA\_M1}} - 1/3\nu_{\text{GviP\_RLvP}} - \nu_{\text{PYo\_AAo}} - \nu_{\text{TCA\_MAm\_PYm}} = \mathbf{112.743}$$

$$\nu_{\text{THRo\_THRm}} = 2.330 = \mathbf{2.330}$$

$$\nu_{\text{VALm\_VALo}} = \nu_{\text{B\_PY\_VAL\_M}} = \mathbf{1.000}$$

**Mitochondrial flux relations:**

$$\nu_{\text{AAm\_ACm}} = -7.320 + \nu_{\text{B\_PY\_AcCoA\_LEU\_M}} + \nu_{\text{B\_THR\_GLY}} + \nu_{\text{IOSm\_IOSo}} + \nu_{\text{PYo\_AAo}} = \mathbf{4.680}$$

$$\nu_{\text{ACm\_AcCoAm}} = -7.320 + \nu_{\text{B\_PY\_AcCoA\_LEU\_M}} + \nu_{\text{B\_THR\_GLY}} + \nu_{\text{IOSm\_IOSo}} + \nu_{\text{PYo\_AAo}} = \mathbf{4.680}$$

$$\nu_{\text{B\_GLU\_OR}} = 1.940 = \mathbf{1.940}$$

$$\nu_{\text{B\_OAm\_ASP\_01}} = \nu_{\text{ASPm\_ASPo}} = \mathbf{2.000}$$

$$\nu_{\text{B\_OAm\_ASP\_02}} = \nu_{\text{ASPm\_ASPo}} = \mathbf{2.000}$$

$$\nu_{\text{B\_OG\_GLU\_M}} = 11.150 + \nu_{\text{ASPm\_ASPo}} - \nu_{\text{B\_GLT}} + \nu_{\text{B\_PY\_ALA\_M1}} + \nu_{\text{OGo\_OGm}} = \mathbf{10.150}$$

$$\nu_{\text{B\_PY\_ALA\_M2}} = \nu_{\text{B\_PY\_ALA\_M1}} = \mathbf{1.000}$$

$$\nu_{\text{B\_PY\_AcCoA\_M}} = \nu_{\text{B\_PY\_AcCoA\_LEU\_M}} + \nu_{\text{IOSm\_IOSo}} = \mathbf{2.000}$$

$$\nu_{B\_PY\_M1} = 8.560 = \mathbf{8.560}$$

$$\nu_{B\_PY\_M2} = 6.230 = \mathbf{6.230}$$

$$\nu_{B\_PY\_THR\_ILE} = 2.330 = \mathbf{2.330}$$

$$\nu_{GLUm\_OGm.01} = \nu_{ASPm\_ASPo} + \nu_{B\_PY\_ALA\_M1} = \mathbf{3.000}$$

$$\nu_{GLUm\_OGm.02} = \nu_{ASPm\_ASPo} + \nu_{B\_PY\_ALA\_M1} = \mathbf{3.000}$$

$$\nu_{TCA\_CIm\_OGm} = 101.300 + \nu_{B\_THR\_GLY} - 1/3\nu_{GviP\_RLvP} = \mathbf{99.633}$$

$$\nu_{TCA\_FUm\_MAm} = 90.150 + \nu_{B\_THR\_GLY} - 1/3\nu_{GviP\_RLvP} + \nu_{US\_C\_ASP\_AS} = \mathbf{90.983}$$

$$\nu_{TCA\_MAm\_OAm} = 90.150 + \nu_{B\_THR\_GLY} - 1/3\nu_{GviP\_RLvP} - \nu_{TCA\_MAm\_PYm} + \nu_{US\_C\_ASP\_AS} = \mathbf{90.983}$$

$$\nu_{TCA\_OAm\_AcCoAm\_CIm} = 101.300 + \nu_{B\_THR\_GLY} - 1/3\nu_{GviP\_RLvP} = \mathbf{99.633}$$

$$\nu_{TCA\_OGm\_SUCoAm} = 90.150 + \nu_{B\_THR\_GLY} - 1/3\nu_{GviP\_RLvP} = \mathbf{88.483}$$

$$\nu_{TCA\_PYm\_AcCoAm} = 108.620 - 1/3\nu_{GviP\_RLvP} - \nu_{PYo\_AAo} = \mathbf{96.953}$$

$$\nu_{TCA\_SUCoAm\_SUM} = 90.150 + \nu_{B\_THR\_GLY} - 1/3\nu_{GviP\_RLvP} = \mathbf{88.483}$$

$$\nu_{TCA\_SUM\_FUm} = 90.150 + \nu_{B\_THR\_GLY} - 1/3\nu_{GviP\_RLvP} = \mathbf{88.483}$$

## 5.2 Constraints

$$1.94 \leq \nu_{US\_C\_ASP\_AS}$$

$$\nu_{B\_PY\_AcCoA\_LEU\_M} \leq 3.57$$

$$\nu_{B\_THR\_GLY} \leq 1.17$$

$$\nu_{GviP\_RLvP} + 3.0\nu_{PYo\_AAo} \leq 325.86$$

$$\nu_{GviP\_RLvP} \leq 270.45 + 3.0\nu_{B\_THR\_GLY}$$

Table 3: Extreme independent fluxes

| Fluxes                              | 1      | 2     | 3       | 4      | 5      | 6      | 7      | 8      | 9      | 10      | 11    | 12     |
|-------------------------------------|--------|-------|---------|--------|--------|--------|--------|--------|--------|---------|-------|--------|
| $\nu_{\text{ASPm\_ASPo}}$           | 0.0    | 0.0   | 0.0     | 0.0    | 0.0    | 0.0    | 0.0    | 0.0    | 0.0    | 0.0     | 0.0   | 0.0    |
| $\nu_{\text{B\_GLT}}$               | -70.15 | 21.17 | 21.17   | -70.15 | 21.17  | 21.17  | 21.17  | 21.17  | -70.15 | 21.17   | 21.17 | -70.15 |
| $\nu_{\text{B\_PY\_ALA\_M1}}$       | 2.77   | 2.77  | 2.77    | 2.77   | 2.77   | 2.77   | 2.77   | 2.77   | 2.77   | 2.77    | 2.77  | 2.77   |
| $\nu_{\text{B\_PY\_AcCoA\_LEU\_M}}$ | 3.57   | 3.57  | 3.57    | 3.57   | 3.57   | 3.57   | 0.0    | 0.0    | 0.0    | 0.0     | 0.0   | 0.0    |
| $\nu_{\text{B\_PY\_VAL\_M}}$        | 2.66   | 2.66  | 2.66    | 2.66   | 2.66   | 2.66   | 2.66   | 2.66   | 2.66   | 2.66    | 2.66  | 2.66   |
| $\nu_{\text{B\_THR\_GLY}}$          | -90.15 | 1.17  | 1.17    | -90.15 | 1.17   | 1.17   | 1.17   | 1.17   | -90.15 | 1.17    | 1.17  | -90.15 |
| $\nu_{\text{GviP\_RLvP}}$           | 0.0    | 0.0   | 0.0     | 0.0    | 273.96 | 273.96 | 273.96 | 273.96 | 0.0    | 0.0     | 0.0   | 0.0    |
| $\nu_{\text{IOSm\_IOSo}}$           | 93.9   | 2.58  | -106.04 | -14.72 | -14.72 | 2.58   | -11.15 | 6.15   | -11.15 | -102.47 | 6.15  | 97.47  |
| $\nu_{\text{OA\_PEP}}$              | 0.0    | 0.0   | 0.0     | 0.0    | 0.0    | 0.0    | 0.0    | 0.0    | 0.0    | 0.0     | 0.0   | 0.0    |
| $\nu_{\text{OGoo\_OGm}}$            | -84.07 | 7.25  | 7.25    | -84.07 | 7.25   | 7.25   | 7.25   | 7.25   | -84.07 | 7.25    | 7.25  | -84.07 |
| $\nu_{\text{PYo\_AAo}}$             | 0.0    | 0.0   | 108.62  | 108.62 | 17.3   | 0.0    | 17.3   | 0.0    | 108.62 | 108.62  | 0.0   | 0.0    |
| $\nu_{\text{TCA\_MAM\_PYm}}$        | 0.0    | 0.0   | 0.0     | 0.0    | 0.0    | 0.0    | 0.0    | 0.0    | 0.0    | 0.0     | 0.0   | 0.0    |
| $\nu_{\text{US\_C\_ASP\_AS}}$       | 1.94   | 1.94  | 1.94    | 1.94   | 1.94   | 1.94   | 1.94   | 1.94   | 1.94   | 1.94    | 1.94  | 1.94   |
